# Supplementary material for: Diverse cellular architecture of atherosclerotic plaque derives from clonal expansion of a few medial SMCs
Source: JCI journal article supplement (doi:10.1172/jci.insight.95890), 2017-10-04
Supplement: sd1 [file 1]

## **Supplemental Material**

### **Few medial SMCs produce clonal, but heterogenous, cell populations in atherosclerosis**

Jacobsen K, Lund MB, Shim J, Gunnarsen S, Füchtbauer EM, Kjolby M, Carramolino L, Bentzon JF.

#### **Contents**

|                       |        |
|-----------------------|--------|
| Supplemental Figure 1 | Page 2 |
| Supplemental Figure 2 | Page 3 |
| Supplemental Figure 3 | Page 4 |
| Supplemental Figure 4 | Page 5 |

## Supplemental Figure 1

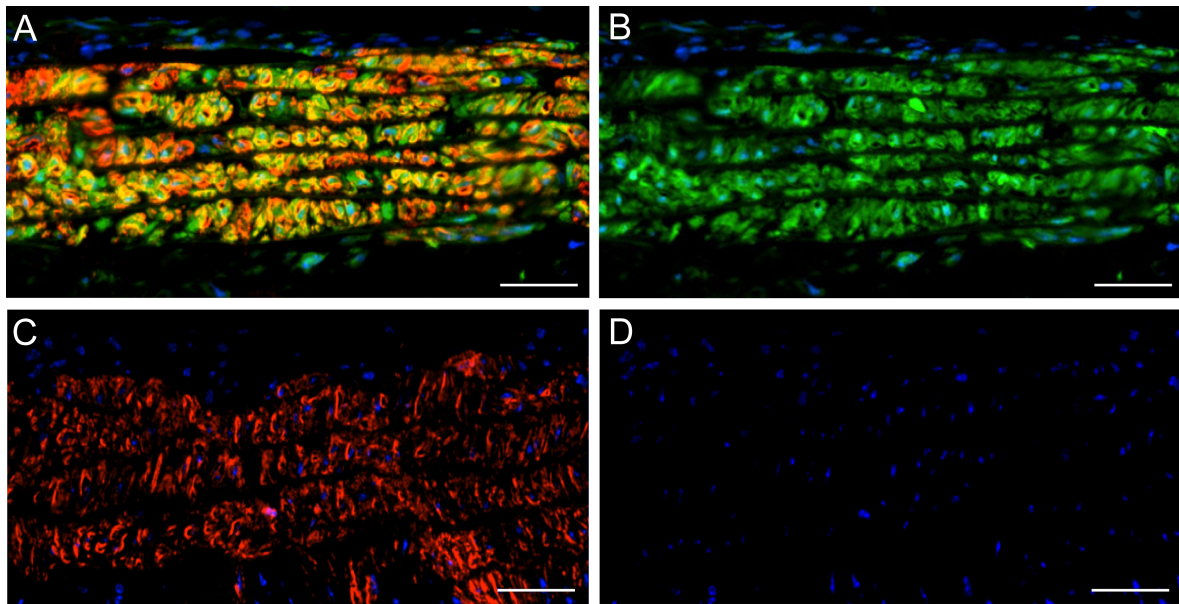

**Supplemental Figure 1.** **A**, Aortic arterial media in an *eGFP+Apoe-/- <-> eGFP+Apoe-/-* mouse showing ubiquitous expression of eGFP (green) in ACTA2 (red)-positive medial SMCs. **B**, The image in A without the red fluorescent channel. **C**, Aortic arterial media in an *Apoe-/- <-> Apoe-/-* mouse showing non-fluorescent, ACTA2 (red)-stained medial SMCs **D**, The image in A without the red fluorescent channel. Nuclei are stained with DAPI (blue). Scale bars 50  $\mu\text{m}$ .

## Supplemental Figure 2

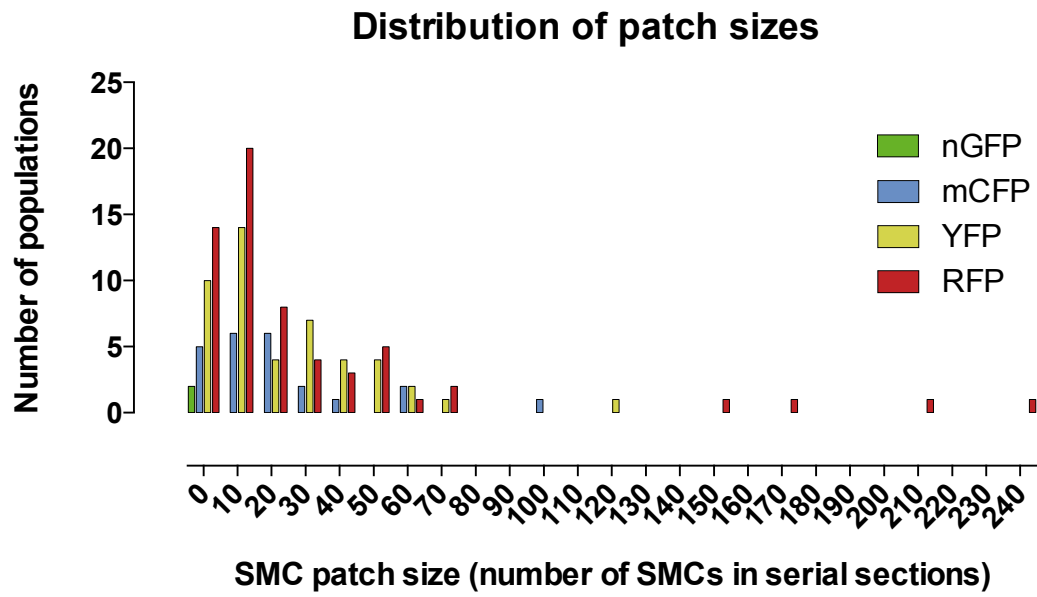

**Supplemental Figure 2.** Histogram of the total number of SMC profiles in patches separated by patch color. The largest RFP+ patches are outliers indicating that they may have derived from more than one founder cell.

### Supplemental Figure 3

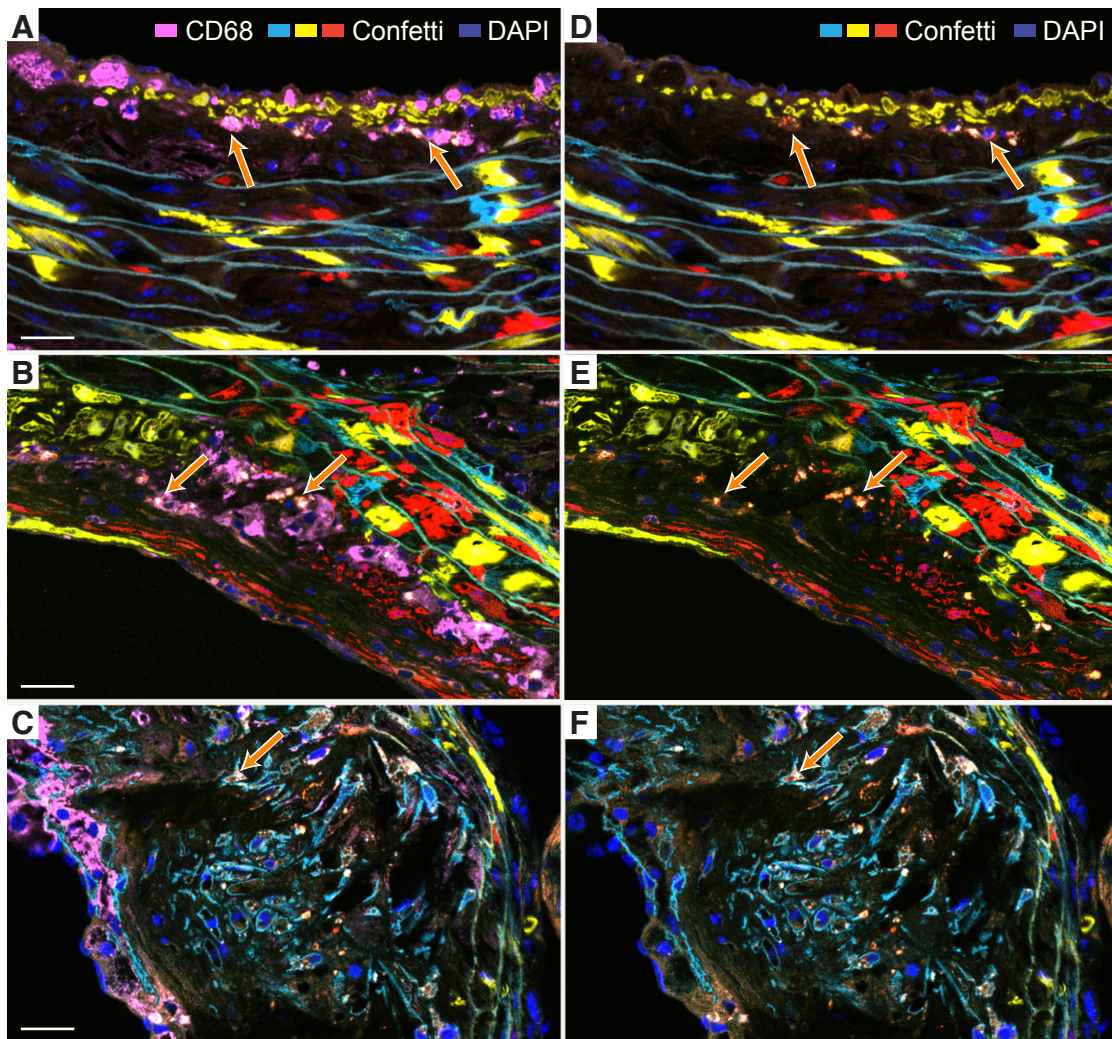

**Supplemental Figure 3.** A-C, Abundant CD68-positive cells are present in plaques, but no SMC lineage cells stain positive for CD68. CD68 staining was performed with a near-infrared fluorochrome but shown in light magenta for clarity. The section did not contain nGFP+ SMCs, and the green channel is not shown. D-F, Images in A-C shown without the CD68 staining signal. Please note that the orange/gray areas are autofluorescence (some are marked with orange arrows) and not overlapping Confetti fluorescence and CD68 staining signal. Scale bars 25  $\mu$ m.

### Supplemental Figure 4

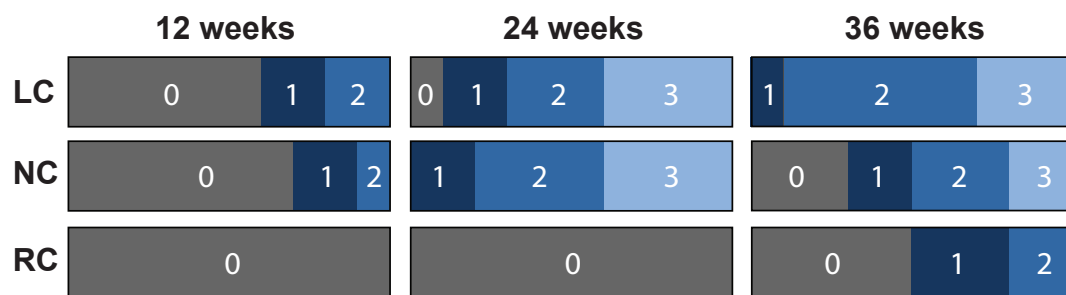

**Supplemental Figure 4.** Number of different Confetti colors in atherosclerotic lesions in the left (LC), non (NC) and right (RC) coronary sinus after 12, 24, and 36 weeks of plaque development.
